# Supplementary material for: Microbiological Characterization of Protected Designation of Origin Serra da Estrela Cheese
Source: MDPI journal article supplement (doi:10.3390/foods12102008), 2023-05-16
Supplement: s1 [file s1]

|                                                                                   | Milk<br>(n=1)      | Cardoon        |                |                | Curd               |                    |                    | Cheese             |                    |                    |
|-----------------------------------------------------------------------------------|--------------------|----------------|----------------|----------------|--------------------|--------------------|--------------------|--------------------|--------------------|--------------------|
|                                                                                   |                    | Sample 1       | Sample 2       | Sample 3       | Sample 1           | Sample 2           | Sample 3           | Sample 1           | Sample 2           | Sample 3           |
| <b>Escherichia coli</b><br>acc. ISO 16649-2:2001                                  | 0.00<br>(0.00)     | n.d.           | 1.9<br>(0.2)   | n.d.           | 1.00<br>(0.00)     | n.d.               | 0.5<br>(0.7)       | 3.2<br>(0.1)       | 2.7<br>(0.1)       | 2.6<br>(0.1)       |
| <b>Enterobacteriaceae</b><br>acc. 21528-2:2017                                    | 1.8<br>(0.1)       | 5.3<br>(0.1)   | 6.91<br>(0.00) | 5.30<br>(0.06) | 2.8<br>(0.3)       | 3.68<br>(0.08)     | 2.9<br>(0.1)       | 5.05<br>(0.07)     | 4.99<br>(0.08)     | 4.05<br>(0.00)     |
| <b>Bacillus cereus</b><br>acc. ISO 7932:2004                                      | n.d.               | 1.8<br>(0.2)   | 1.47<br>(0.07) | 1.3<br>(0.2)   | n.d.               | n.d.               | n.d.               | n.d.               | n.d.               | n.d.               |
| <b>Coagulase-positive staphylococci</b><br>acc. ISO 6888-1:1999                   | n.d.               | n.d.           | n.d.           | n.d.           | n.d.               | n.d.               | n.d.               | n.d.               | n.d.               | n.d.               |
| <b>Listeria monocytogenes</b><br>acc. 11290-2:2017                                | n.d.               | n.d.           | n.d.           | n.d.           | n.d.               | n.d.               | n.d.               | n.d.               | n.d.               | n.d.               |
| <b>Listeria spp.</b><br>acc. 11290-2:2017                                         | n.d.               | n.d.           | 2.9<br>(0.3)   | n.d.           | 1.4<br>(0.5)       | n.d.               | n.d.               | n.d.               | n.d.               | 1.8<br>(0.2)       |
| <b>Clostridium perfringens</b><br>acc. ISO 7937:2004                              | ND                 | ND             | ND             | ND             | ND                 | ND                 | ND                 | n.d.               | n.d.               | n.d.               |
| <b>Salmonella spp.</b><br>acc. ISO 6579-1:2017                                    | Absent<br>(in 25g) | ND             | ND             | ND             | Absent<br>(in 25g) |
| <b>Yeasts</b><br>acc. ISO 21527-1:2008                                            | 4.4<br>(0.3)       | 4.99<br>(0.00) | 5.6<br>(0.4)   | 4.0<br>(0.1)   | 4.3<br>(0.2)       | 4.0<br>(0.2)       | 3.5<br>(0.4)       | 3.0<br>(0.3)       | 3.40<br>(0.08)     | 2.7<br>(0.3)       |
| <b>Moulds</b><br>acc. ISO 21527-1:2008                                            | 2<br>(2)           | 6.31<br>(0.09) | 5.4<br>(0.1)   | 4.2<br>(0.1)   | 2<br>(2)           | 2<br>(2)           | 3.18<br>(0.00)     | 2.2<br>(0.3)       | 2.6<br>(0.2)       | 1<br>(2)           |
| <b>Psychrophiles</b>                                                              | 7.4<br>(0.3)       | 6.42<br>(0.03) | 7.66<br>(0.09) | 6.15<br>(0.09) | 7.50<br>(0.03)     | 7.20<br>(0.08)     | 6.8<br>(0.2)       | ND                 | ND                 | ND                 |
| Presumptive<br><b>Lactic Acid Bacteria</b><br>(total aerobic counts)<br>on MRSA   | 6.3<br>(0.1)       | n.d.           | n.d.           | 3.1<br>(0.2)   | 7.0<br>(0.2)       | 6.7<br>(0.2)       | 6.19<br>(0.08)     | 9.0<br>(0.1)       | 8.9<br>(0.1)       | 8.9<br>(0.1)       |
| Presumptive<br><b>Lactic Acid Bacteria</b><br>(total anaerobic counts)<br>on MRSA | 6.0<br>(0.2)       | 4.8<br>(0.1)   | 5.77<br>(0.09) | 4.5<br>(0.2)   | 6.9<br>(0.2)       | 6.5<br>(0.2)       | 6.2<br>(0.1)       | 9.0<br>(0.3)       | 8.9<br>(0.1)       | 9.09<br>(0.05)     |
| Presumptive<br><b>Lactococci</b><br>on M17                                        | 6.35<br>(0.02)     | 5.2<br>(0.1)   | 6.13<br>(0.08) | 5.84<br>(0.01) | 7.13<br>(0.06)     | 6.74<br>(0.07)     | 6.3<br>(0.1)       | 9.37<br>(0.03)     | 9.06<br>(0.09)     | 9.2<br>(0.2)       |
| Presumptive<br><b>Lactobacilli</b><br>on RA                                       | 6.10<br>(0.01)     | n.d.           | 5.84<br>(0.06) | 3.5<br>(0.2)   | 6.95<br>(0.01)     | 6.3<br>(0.5)       | 6.0<br>(0.2)       | 9.12<br>(0.03)     | 8.81<br>(0.06)     | 8.9<br>(0.3)       |
| Presumptive<br><b>Enterococci</b><br>on SBA                                       | 5.75<br>(0.01)     | n.d.           | 5.8<br>(0.1)   | 4.0<br>(0.2)   | 6.32<br>(0.08)     | 5.97<br>(0.03)     | 5.8<br>(0.3)       | 8.0<br>(0.1)       | 7.96<br>(0.06)     | 7.84<br>(0.06)     |
| Presumptive<br><b>Leuconostoc spp.</b><br>on MSE                                  | 5.7<br>(0.1)       | n.d.           | 5.9<br>(0.1)   | 3.6<br>(0.4)   | 6.67<br>(0.08)     | 5.62<br>(0.06)     | 5.6<br>(0.2)       | 8.62<br>(0.07)     | 8.5<br>(0.1)       | 8.40<br>(0.02)     |

ND – Not Determined; n.d. – Not Detected
