# Supplementary material for: Microbiological Characterization of Protected Designation of Origin Serra da Estrela Cheese
Source: MDPI journal article supplement (doi:10.3390/foods12102008), 2023-05-16
Supplement: s1 [file s1]

|                                                                                   | Milk<br>(n=1)      | Cardoon        |                |                | Curd               |                    |                    | Cheese             |                    |                    |
|-----------------------------------------------------------------------------------|--------------------|----------------|----------------|----------------|--------------------|--------------------|--------------------|--------------------|--------------------|--------------------|
|                                                                                   |                    | Sample 1       | Sample 2       | Sample 3       | Sample 1           | Sample 2           | Sample 3           | Sample 1           | Sample 2           | Sample 3           |
| <b><i>Escherichia coli</i></b><br>acc. ISO 16649-2:2001                           | n.d.               | 3.1<br>(0.2)   | n.d.           | n.d.           | 1.6<br>(0.2)       | 1.00<br>(0.00)     | 1.3<br>(0.4)       | 2.91<br>(0.04)     | 3.1<br>(0.1)       | 2.5<br>(0.4)       |
| <b><i>Enterobacteriaceae</i></b><br>acc. 21528-2:2017                             | 2.1<br>(0.1)       | 6.35<br>(0.00) | 4.72<br>(0.05) | 5.78<br>(0.00) | 3.37<br>(0.08)     | 2.84<br>(0.02)     | 2.6<br>(0.2)       | 5.39<br>(0.05)     | 4.9<br>(0.2)       | 5.16<br>(0.08)     |
| <b><i>Bacillus cereus</i></b><br>acc. ISO 7932:2004                               | n.d.               | n.d.           | 1.6<br>(0.2)   | 1.64<br>(0.00) | n.d.               | n.d.               | n.d.               | n.d.               | n.d.               | n.d.               |
| <b>Coagulase-positive<br/>staphylococci</b><br>acc. ISO 6888-1:1999               | n.d.               | n.d.           | n.d.           | n.d.           | 3.69<br>(0.03)     | 4.18<br>(0.00)     | 3.73<br>(0.02)     | n.d.               | n.d.               | n.d.               |
| <b><i>Listeria monocytogenes</i></b><br>acc. 11290-2:2017                         | n.d.               | n.d.           | n.d.           | n.d.           | n.d.               | n.d.               | n.d.               | n.d.               | n.d.               | n.d.               |
| <b><i>Listeria spp.</i></b><br>acc. 11290-2:2017                                  | 3.1<br>(0.1)       | 3.1<br>(0.1)   | n.d.           | n.d.           | 2.00<br>(0.08)     | 2.0<br>(0.1)       | 1.88<br>(0.07)     | 0.5<br>(0.7)       | 1.94<br>(0.04)     | n.d.               |
| <b><i>Clostridium perfringens</i></b><br>acc. ISO 7937:2004                       | ND                 | ND             | ND             | ND             | ND                 | ND                 | ND                 | 0.00<br>(0.00)     | -0.01<br>(0.00)    | -0.01<br>(0.00)    |
| <b><i>Salmonella spp.</i></b><br>acc. ISO 6579-1:2017                             | Absent<br>(in 25g) | ND             | ND             | ND             | Absent<br>(in 25g) |
| <b>Yeasts</b><br>acc. ISO 21527-1:2008                                            | 3.6<br>(0.1)       | 6.16<br>(0.09) | 5.16<br>(0.07) | 4.8<br>(0.2)   | 3.85<br>(0.07)     | 3.9<br>(0.2)       | 3.9<br>(0.2)       | 2.8<br>(0.2)       | 2.95<br>(0.08)     | 2.8<br>(0.2)       |
| <b>Moulds</b><br>acc. ISO 21527-1:2008                                            | 1.54<br>(0.09)     | 5.5<br>(0.2)   | 4.1<br>(0.3)   | 3.8<br>(0.4)   | 2.7<br>(0.4)       | 1<br>(1)           | n.d.               | 2.3<br>(0.3)       | 2.1<br>(0.2)       | 2<br>(2)           |
| <b>Psychrophiles</b>                                                              | ND                 | 7.08<br>(0.00) | 5.89<br>(0.06) | 5.81<br>(0.08) | ND                 | ND                 | ND                 | 5.60<br>(0.02)     | 5.4<br>(0.2)       | 5.82<br>(0.06)     |
| Presumptive<br><b>Lactic Acid Bacteria</b><br>(total aerobic counts)<br>on MRSA   | 5.17<br>(0.08)     | n.d.           | n.d.           | n.d.           | 6.40<br>(0.09)     | 6.1<br>(0.2)       | 6.0<br>(0.2)       | 8.6<br>(0.2)       | 8.98<br>(0.05)     | 8.93<br>(0.07)     |
| Presumptive<br><b>Lactic Acid Bacteria</b><br>(total anaerobic counts)<br>on MRSA | 5.2<br>(0.1)       | 3.1<br>(0.2)   | n.d.           | 3.4<br>(0.3)   | 6.3<br>(0.1)       | 6.3<br>(0.3)       | 6.0<br>(0.1)       | 8.8<br>(0.2)       | 8.81<br>(0.07)     | 8.69<br>(0.06)     |
| Presumptive<br><b>Lactococci</b><br>on M17                                        | 5.3<br>(0.2)       | 5.4<br>(0.2)   | 3.5<br>(0.1)   | 4.5<br>(0.3)   | 6.33<br>(0.07)     | 6.42<br>(0.06)     | 6.01<br>(0.08)     | 9.1<br>(0.1)       | 7.9<br>(0.2)       | 8.73<br>(0.04)     |
| Presumptive<br><b>Lactobacilli</b><br>on RA                                       | 4.9<br>(0.2)       | n.d.           | n.d.           | 3.58<br>(0.09) | 6.3<br>(0.1)       | 5.8<br>(0.1)       | 5.80<br>(0.08)     | 8.55<br>(0.08)     | 8.9<br>(0.1)       | 8.5<br>(0.2)       |
| Presumptive<br><b>Enterococci</b><br>on SBA                                       | 4.4<br>(0.1)       | 3.9<br>(0.4)   | n.d.           | 4.2<br>(0.1)   | 5.5<br>(0.1)       | 5.2<br>(0.2)       | 5.5<br>(0.1)       | 8.8<br>(0.2)       | 7.7<br>(0.2)       | 7.6<br>(0.1)       |
| Presumptive<br><b><i>Leuconostoc spp.</i></b><br>on MSE                           | 4.72<br>(0.04)     | 5.1<br>(0.1)   | 3.3<br>(0.7)   | 4.61<br>(0.07) | 4.8<br>(0.1)       | 5.4<br>(0.4)       | 5.5<br>(0.2)       | 8.4<br>(0.1)       | 8.58<br>(0.06)     | 8.35<br>(0.05)     |

ND – Not Determined; n.d. – Not Detected; n – number of samples analyzed
