# Supplementary material for: Microbiological Characterization of Protected Designation of Origin Serra da Estrela Cheese
Source: MDPI journal article supplement (doi:10.3390/foods12102008), 2023-05-16
Supplement: s1 [file s1]

|                                                                                   | Milk<br>(n=1)      | Cardoon<br>(n=1) | Curd               |                    |                    | Cheese             |                    |                    |
|-----------------------------------------------------------------------------------|--------------------|------------------|--------------------|--------------------|--------------------|--------------------|--------------------|--------------------|
|                                                                                   |                    |                  | Sample 1           | Sample 2           | Sample 3           | Sample 1           | Sample 2           | Sample 3           |
| <b><i>Escherichia coli</i></b><br>acc. ISO 16649-2:2001                           | n.d.               | n.d.             | n.d.               | 1.4<br>(0.5)       | 0.7<br>(0.9)       | 2.4<br>(0.3)       | 2.6<br>(0.2)       | 2.2<br>(0.1)       |
| <b><i>Enterobacteriaceae</i></b><br>acc. 21528-2:2017                             | 1.2<br>(0.2)       | 3.3<br>(0.1)     | 2.38<br>(0.08)     | 2.56<br>(0.06)     | 2.37<br>(0.08)     | 3.96<br>(0.02)     | 3.80<br>(0.03)     | 4.14<br>(0.06)     |
| <b><i>Bacillus cereus</i></b><br>acc. ISO 7932:2004                               | n.d.               | n.d.             | n.d.               | n.d.               | n.d.               | n.d.               | n.d.               | n.d.               |
| <b>Coagulase-positive<br/>staphylococci</b><br>acc. ISO 6888-1:1999               | n.d.               | n.d.             | n.d.               | n.d.               | n.d.               | n.d.               | n.d.               | n.d.               |
| <b><i>Listeria monocytogenes</i></b><br>acc. 11290-2:2017                         | n.d.               | n.d.             | n.d.               | n.d.               | n.d.               | n.d.               | n.d.               | n.d.               |
| <b><i>Listeria spp.</i></b><br>acc. 11290-2:2017                                  | n.d.               | n.d.             | n.d.               | 1.1<br>(0.4)       | 0.70<br>(0.00)     | 1.8<br>(0.2)       | n.d.               | n.d.               |
| <b><i>Clostridium perfringens</i></b><br>acc. ISO 7937:2004                       | ND                 | ND               | ND                 | ND                 | ND                 | n.d.               | n.d.               | 0.05<br>(0.00)     |
| <b><i>Salmonella spp.</i></b><br>acc. ISO 6579-1:2017                             | Absent<br>(in 25g) | ND               | Absent<br>(in 25g) |
| <b>Yeasts</b><br>acc. ISO 21527-1:2008                                            | 3.30<br>(0.06)     | 3.32<br>(0.08)   | 3.35<br>(0.06)     | 3.76<br>(0.06)     | 3.6<br>(0.3)       | 3.7<br>(0.7)       | 3.9<br>(0.2)       | 3.7<br>(0.2)       |
| <b>Moulds</b><br>acc. ISO 21527-1:2008                                            | 3.1<br>(0.2)       | 3.6<br>(0.1)     | 3.3<br>(0.3)       | 3.87<br>(0.09)     | 3.3<br>(0.3)       | 3.00<br>(0.00)     | 3.1<br>(0.2)       | 2.9<br>(0.3)       |
| <b>Psychrophiles</b>                                                              | 4.96<br>(0.00)     | 5.7<br>(0.1)     | 5.00<br>(0.03)     | 5.20<br>(0.2)      | 5.1<br>(0.4)       | 5.8<br>(0.3)       | 6.0<br>(0.2)       | 5.8<br>(0.1)       |
| Presumptive<br><b>Lactic Acid Bacteria</b><br>(total aerobic counts)<br>on MRSA   | 5.4<br>(0.1)       | 3.0<br>(0.1)     | 6.59<br>(0.07)     | 7.06<br>(0.02)     | 7.2<br>(0.2)       | 8.95<br>(0.04)     | 8.79<br>(0.03)     | 8.74<br>(0.04)     |
| Presumptive<br><b>Lactic Acid Bacteria</b><br>(total anaerobic counts)<br>on MRSA | 5.26<br>(0.05)     | 3.1<br>(0.2)     | 6.5<br>(0.2)       | 7.09<br>(0.04)     | 7.3<br>(0.3)       | 8.95<br>(0.02)     | 8.85<br>(0.03)     | 8.82<br>(0.03)     |
| Presumptive<br><b>Lactococci</b><br>on M17                                        | 5.4<br>(0.3)       | 5.07<br>(0.04)   | 6.8<br>(0.3)       | 7.40<br>(0.01)     | 7.45<br>(0.04)     | 9.3<br>(0.1)       | 9.3<br>(0.1)       | 9.21<br>(0.08)     |
| Presumptive<br><b>Lactobacilli</b><br>on RA                                       | 5.3<br>(0.2)       | 3.0<br>(0.3)     | 7.0<br>(0.1)       | 7.5<br>(0.1)       | 7.33<br>(0.07)     | 9.1<br>(0.1)       | 8.9<br>(0.1)       | 8.97<br>(0.08)     |
| Presumptive<br><b>Enterococci</b><br>on SBA                                       | 4.5<br>(0.2)       | 3.65<br>(0.07)   | 5.6<br>(0.4)       | 5.9<br>(0.1)       | 5.88<br>(0.09)     | 7.1<br>(0.2)       | 7.2<br>(0.1)       | 7.2<br>(0.1)       |
| Presumptive<br><b><i>Leuconostoc spp.</i></b><br>on MSE                           | 5.0<br>(0.3)       | 3.6<br>(0.3)     | 6.3<br>(0.2)       | 6.4<br>(0.3)       | 6.46<br>(0.02)     | 8.81<br>(0.09)     | 8.7<br>(0.3)       | 8.3<br>(0.2)       |

ND – Not Determined; n.d. – Not Detected
