# Supplementary material for: Microbiological Characterization of Protected Designation of Origin Serra da Estrela Cheese
Source: Foods. 2023 May 16;12(10):2008. doi: 10.3390/foods12102008 (PMC10217187; doi:10.3390/foods12102008)
Supplement: Supplementary file 1 [file foods-12-02008-s001.zip]

Archive with 4 entries (4 files):
- foods-2339227-supplementary/Table S1.pdf
- foods-2339227-supplementary/Table S2.pdf
- foods-2339227-supplementary/Table S3.pdf
- foods-2339227-supplementary/Table S4.xlsx
