# Supplementary material for: Microbiological Characterization of Protected Designation of Origin Serra da Estrela Cheese
Source: Foods. 2023 May 16;12(10):2008. doi: 10.3390/foods12102008 (PMC10217187; doi:10.3390/foods12102008)
Supplement: Supplementary file 1 [file foods-12-02008-s001.zip › foods-2339227-supplementary/Table S4.xlsx]

## Sheet: Folha1
	Period	Matrix	Sample	Phenotype	Colony	Biochemical confirmation tests			Fragment size used (bp)	Homology (%)	Identification
						Catalase	Cytochrome oxidase	Gram staining
	December/January (Autumn)	Ovine raw milk	#1	1	1	-	-	Gram positive rods	724	100	Leuconostoc mesenteroides
	December/January (Autumn)	Ovine raw milk	#1	1	2	-	-	Gram positive rods	804	99.88	Leuconostoc mesenteroides
	December/January (Autumn)	Ovine raw milk	#1	1	3	-	-	Gram positive rods	441	98.43	Lacticaseibacillus paracasei
	December/January (Autumn)	Ovine raw milk	#1	2	1	-	-	Gram positive rods	615	99.83	Leuconostoc mesenteroides
	December/January (Autumn)	Ovine raw milk	#1	2	2	-	-	Gram positive rods	853	99.77	Lacticaseibacillus paracasei
	December/January (Autumn)	Ovine raw milk	#1	2	3	-	-	Gram positive rods	1397	94.37	Lacticaseibacillus paracasei
	December/January (Autumn)	Ovine raw milk	#1	3	1	-	-	Gram positive cocci	533	99.62	Enterococcus faecium
	December/January (Autumn)	Ovine raw milk	#1	3	2	-	-	Gram positive rods	1363	94.72	Leuconostoc mesenteroides
	December/January (Autumn)	Ovine raw milk	#1	3	3	-	-	Gram positive cocci	445	98.65	Enterococcus durans
	December/January (Autumn)	Cardoon	#1	-	-	NA	NA	-	-	-	-
	December/January (Autumn)	Cardoon	#2	2	1	-	-	Gram positive cocci	976	99.90	Enterococcus faecium
	December/January (Autumn)	Cardoon	#2	2	2	-	-	Gram positive cocci	768	99.22	Enterococcus faecium
	December/January (Autumn)	Cardoon	#2	2	3	-	-	Gram positive cocci	824	100	Enterococcus faecium
	December/January (Autumn)	Cardoon	#3	1	1	-	-	Gram positive rods	628	100	Leuconostoc mesenteroides
	December/January (Autumn)	Cardoon	#3	1	2	-	-	Gram positive rods	550	100	Leuconostoc mesenteroides
	December/January (Autumn)	Cardoon	#3	1	3	-	-	Gram positive rods	915	99.89	Latilactobacillus graminis
	December/January (Autumn)	Curd	#1	1	1	-	-	Gram positive rods	876	100	Lacticaseibacillus paracasei
	December/January (Autumn)	Curd	#1	1	2	-	-	Gram positive rods	905	100	Lacticaseibacillus paracasei
	December/January (Autumn)	Curd	#1	1	3	-	-	Gram positive rods	767	100	Leuconostoc mesenteroides
	December/January (Autumn)	Curd	#1	2	1	-	-	Gram positive rods	670	100	Leuconostoc mesenteroides
	December/January (Autumn)	Curd	#1	2	2	-	-	Gram positive rods	599	100	Leuconostoc mesenteroides
	December/January (Autumn)	Curd	#1	2	3	-	-	Gram positive rods	882	99.89	Leuconostoc mesenteroides
	December/January (Autumn)	Curd	#1	3	1	-	-	Gram positive cocci	934	100	Enterococcus durans
	December/January (Autumn)	Curd	#1	3	2	-	-	Gram positive cocci	931	100	Lactococcus lactis
	December/January (Autumn)	Curd	#1	3	3	-	-	Gram positive cocci	583	98.97	Streptococcus infantis
	December/January (Autumn)	Curd	#2	1	1	-	-	Gram positive rods	940	99.79	Lacticaseibacillus paracasei
	December/January (Autumn)	Curd	#2	1	2	-	-	Gram positive rods	859	100	Lacticaseibacillus paracasei
	December/January (Autumn)	Curd	#2	1	3	-	-	Gram positive rods	1041	100	Leuconostoc mesenteroides
	December/January (Autumn)	Curd	#2	2	1	-	-	Gram positive rods	628	100	Leuconostoc mesenteroides
	December/January (Autumn)	Curd	#2	2	2	-	-	Gram positive rods	954	100	Leuconostoc mesenteroides
	December/January (Autumn)	Curd	#2	2	3	-	-	Gram positive rods	404	100	Leuconostoc citreum
	December/January (Autumn)	Curd	#2	3	1	-	-	Gram positive cocci	597	100	Lactococcus lactis
	December/January (Autumn)	Curd	#2	3	2	-	-	Gram positive cocci	759	100	Enterococcus faecium
	December/January (Autumn)	Curd	#2	3	3	-	-	Gram positive cocci	732	98.77	Lactococcus lactis
	December/January (Autumn)	Curd	#3	1	1	-	-	Gram positive cocci	747	100	Enterococcus lactis
	December/January (Autumn)	Curd	#3	1	2	-	-	Gram positive rods	1056	100	Leuconostoc mesenteroides
	December/January (Autumn)	Curd	#3	1	3	-	-	Gram positive rods	778	100	Lacticaseibacillus paracasei
	December/January (Autumn)	Curd	#3	2	1	-	-	Gram positive rods	902	100	Lacticaseibacillus paracasei
	December/January (Autumn)	Curd	#3	2	2	-	-	Gram positive rods	857	100	Lacticaseibacillus paracasei
	December/January (Autumn)	Curd	#3	2	3	-	-	Gram positive cocci	728	100	Enterococcus durans
	December/January (Autumn)	Curd	#3	3	1	-	-	Gram positive cocci	853	100	Enterococcus faecium
	December/January (Autumn)	Curd	#3	3	2	-	-	Gram positive cocci	962	99.90	Lactococcus garvieae
	December/January (Autumn)	Curd	#3	3	3	-	-	Gram positive cocci	976	100	Enterococcus faecalis
	December/January (Autumn)	Cheese	#1	1	1	-	-	Gram positive rods	661	100	Leuconostoc mesenteroides
	December/January (Autumn)	Cheese	#1	1	2	-	-	Gram positive rods	965	100	Leuconostoc mesenteroides
	December/January (Autumn)	Cheese	#1	1	3	-	-	Gram positive rods	930	99.89	Leuconostoc mesenteroides
	December/January (Autumn)	Cheese	#1	2	1	-	-	Gram positive rods	988	100	Lacticaseibacillus paracasei
	December/January (Autumn)	Cheese	#1	2	2	-	-	Gram positive rods	952	100	Lacticaseibacillus paracasei
	December/January (Autumn)	Cheese	#1	2	3	-	-	Gram positive rods	951	100	Lacticaseibacillus paracasei
	December/January (Autumn)	Cheese	#1	3	1	-	-	Gram positive cocci	478	100	Lactococcus lactis
	December/January (Autumn)	Cheese	#1	3	2	-	-	Gram positive cocci	620	100	Lactococcus lactis
	December/January (Autumn)	Cheese	#1	3	3	-	-	Gram positive cocci	945	99.89	Lactococcus lactis
	December/January (Autumn)	Cheese	#1	4	1	-	-	Gram positive rods	972	99.49	Lacticaseibacillus casei
	December/January (Autumn)	Cheese	#1	4	2	-	-	Gram positive rods	1355	94.77	Leuconostoc mesenteroides
	December/January (Autumn)	Cheese	#1	4	3	-	-	Gram positive rods	1369	96.94	Lacticaseibacillus paracasei
	December/January (Autumn)	Cheese	#2	1	1	-	-	Gram positive rods	1022	100	Leuconostoc mesenteroides
	December/January (Autumn)	Cheese	#2	1	2	-	-	Gram positive rods	1011	99.90	Leuconostoc mesenteroides
	December/January (Autumn)	Cheese	#2	1	3	-	-	Gram positive rods	1010	99.90	Leuconostoc mesenteroides
	December/January (Autumn)	Cheese	#2	2	1	-	-	Gram positive rods	956	100	Lacticaseibacillus paracasei
	December/January (Autumn)	Cheese	#2	2	2	-	-	Gram positive rods	975	100	Leuconostoc mesenteroides
	December/January (Autumn)	Cheese	#2	2	3	-	-	Gram positive rods	951	100	Lacticaseibacillus paracasei
	December/January (Autumn)	Cheese	#2	3	2	-	-	Gram positive rods	1288	97.82	Lacticaseibacillus paracasei
	December/January (Autumn)	Cheese	#2	3	3	-	-	Gram positive cocci	943	99.68	Enterococcus durans
	December/January (Autumn)	Cheese	#2	4	1	-	-	Gram positive rods	1373	97.74	Lacticaseibacillus paracasei
	December/January (Autumn)	Cheese	#3	1	1	-	-	Gram positive rods	958	99.90	Leuconostoc mesenteroides
	December/January (Autumn)	Cheese	#3	1	2	-	-	Gram positive rods	145	100	Leuconostoc mesenteroides
	December/January (Autumn)	Cheese	#3	1	3	-	-	Gram positive rods	776	100	Leuconostoc mesenteroides
	December/January (Autumn)	Cheese	#3	2	1	-	-	Gram positive rods	989	100	Lacticaseibacillus paracasei
	December/January (Autumn)	Cheese	#3	2	2	-	-	Gram positive rods	1360	99.02	Leuconostoc mesenteroides
	December/January (Autumn)	Cheese	#3	2	3	-	-	Gram positive rods	660	100	Lacticaseibacillus paracasei
	December/January (Autumn)	Cheese	#3	3	1	-	-	Gram positive cocci	992	99.80	Enterococcus durans
	December/January (Autumn)	Cheese	#3	3	2	-	-	Gram positive rods	295	99.66	Leuconostoc mesenteroides
	December/January (Autumn)	Cheese	#3	3	3	-	-	Gram positive rods	803	100	Leuconostoc mesenteroides
	December/January (Autumn)	Cheese	#3	4	1	-	-	Gram positive rods	934	99.79	Lactiplantibacillus plantarum
	December/January (Autumn)	Cheese	#3	4	2	-	-	Gram positive rods	476	91.06	Lacticaseibacillus paracasei
	February/March (Winter)	Ovine raw milk	#1	1	1	-	-	Gram positive rods	882	100	Lactiplantibacillus plantarum
	February/March (Winter)	Ovine raw milk	#1	1	2	-	-	Gram positive rods	860	100	Lacticaseibacillus paracasei
	February/March (Winter)	Ovine raw milk	#1	1	3	-	-	Gram positive rods	690	99.86	Leuconostoc mesenteroides
	February/March (Winter)	Ovine raw milk	#1	2	1	-	-	Gram positive rods	944	100	Leuconostoc mesenteroides
	February/March (Winter)	Ovine raw milk	#1	2	2	-	-	Gram positive rods	654	100	Leuconostoc mesenteroides
	February/March (Winter)	Ovine raw milk	#1	2	3	-	-	Gram positive rods	995	100	Leuconostoc mesenteroides
	February/March (Winter)	Cardoon	#1	1	1	-	-	Gram positive cocci	1409	94.26	Enterococcus gallinarum
	February/March (Winter)	Cardoon	#1	1	2	-	-	Gram positive cocci	1377	99.49	Enterococcus gallinarum
	February/March (Winter)	Cardoon	#1	1	3	-	-	Gram positive cocci	1107	100	Enterococcus gallinarum
	February/March (Winter)	Cardoon	#1	2	1	-	-	Gram positive cocci	138	100	Enterococcus faecium
	February/March (Winter)	Cardoon	#1	2	2	-	-	Gram positive cocci	1322	99.77	Enterococcus gallinarum
	February/March (Winter)	Cardoon	#1	2	3	-	-	Gram positive rods	986	100	Leuconostoc mesenteroides
	February/March (Winter)	Cardoon	#2	1	1	-	-	Gram positive cocci	1380	99.93	Enterococcus gallinarum
	February/March (Winter)	Cardoon	#2	1	2	-	-	Gram positive cocci	1217	99.92	Enterococcus gallinarum
	February/March (Winter)	Cardoon	#2	1	3	-	-	Gram positive cocci	899	100	Enterococcus casseliflavus
	February/March (Winter)	Cardoon	#3	1	1	-	-	Gram positive cocci	1021	99.90	Enterococcus faecium
	February/March (Winter)	Cardoon	#3	1	2	-	-	Gram positive cocci	619	99.19	Enterococcus faecium
	February/March (Winter)	Curd	#1	1	1	-	-	Gram positive rods	585	99.60	Leuconostoc mesenteroides
	February/March (Winter)	Curd	#1	1	2	-	-	Gram positive rods	673	99.85	Leuconostoc mesenteroides
	February/March (Winter)	Curd	#1	1	3	-	-	Gram positive rods	1033	99.90	Leuconostoc mesenteroides
	February/March (Winter)	Curd	#1	2	1	-	-	Gram positive rods	1003	99.80	Leuconostoc mesenteroides
	February/March (Winter)	Curd	#1	2	2	-	-	Gram positive rods	628	100	Leuconostoc mesenteroides
	February/March (Winter)	Curd	#1	2	3	-	-	Gram positive cocci	1020	100	Lactococcus lactis
	February/March (Winter)	Curd	#2	1	1	-	-	Gram positive rods	859	99.88	Leuconostoc mesenteroides
	February/March (Winter)	Curd	#2	1	2	-	-	Gram positive cocci	628	100	Lactococcus lactis
	February/March (Winter)	Curd	#2	1	3	-	-	Gram positive cocci	1425	93.41	Enterococcus durans
	February/March (Winter)	Curd	#2	2	1	-	-	Gram positive rods	869	99.89	Leuconostoc mesenteroides
	February/March (Winter)	Curd	#2	2	2	-	-	Gram positive rods	599	100	Leuconostoc mesenteroides
	February/March (Winter)	Curd	#2	2	3	-	-	Gram positive rods	1006	99.90	Leuconostoc mesenteroides
	February/March (Winter)	Curd	#3	1	1	-	-	Gram positive rods	987	99.80	Leuconostoc mesenteroides
	February/March (Winter)	Curd	#3	1	2	-	-	Gram positive cocci	817	100	Enterococcus faecium
	February/March (Winter)	Curd	#3	1	3	-	-	Gram positive cocci	902	99.89	Enterococcus durans
	February/March (Winter)	Curd	#3	2	1	-	-	Gram positive rods	987	99.90	Leuconostoc mesenteroides
	February/March (Winter)	Curd	#3	2	2	-	-	Gram positive rods	843	99.76	Leuconostoc mesenteroides
	February/March (Winter)	Curd	#3	2	3	-	-	Gram positive rods	805	100	Leuconostoc mesenteroides
	February/March (Winter)	Cheese	#1	1	1	-	-	Gram positive rods	922	100	Lacticaseibacillus paracasei
	February/March (Winter)	Cheese	#1	1	2	-	-	Gram positive cocci	904	100	Enterococcus faecium
	February/March (Winter)	Cheese	#1	1	3	-	-	Gram positive rods	1020	100	Lacticaseibacillus paracasei
	February/March (Winter)	Cheese	#1	2	1	-	-	Gram positive cocci	965	99.90	Lactococcus lactis
	February/March (Winter)	Cheese	#1	2	2	-	-	Gram positive cocci	831	99.28	Lactococcus lactis
	February/March (Winter)	Cheese	#1	2	3	-	-	Gram positive cocci	963	99.69	Lactococcus lactis
	February/March (Winter)	Cheese	#2	1	1	-	-	Gram positive rods	669	99.85	Lacticaseibacillus paracasei
	February/March (Winter)	Cheese	#2	1	2	-	-	Gram positive rods	864	100	Lactiplantibacillus plantarum
	February/March (Winter)	Cheese	#2	1	3	-	-	Gram positive rods	789	100	Lacticaseibacillus paracasei
	February/March (Winter)	Cheese	#2	2	1	-	-	Gram positive cocci	893	99.89	Lactococcus lactis
	February/March (Winter)	Cheese	#2	2	2	-	-	Gram positive rods	775	100	Leuconostoc mesenteroides
	February/March (Winter)	Cheese	#2	2	3	-	-	Gram positive rods	1418	94.49	Latilactobacillus curvatus
	February/March (Winter)	Cheese	#3	1	1	-	-	Gram positive rods	952	100	Lacticaseibacillus paracasei
	February/March (Winter)	Cheese	#3	1	2	-	-	Gram positive rods	850	100	Lacticaseibacillus paracasei
	February/March (Winter)	Cheese	#3	1	3	-	-	Gram positive rods	827	99.64	Lactiplantibacillus plantarum
	February/March (Winter)	Cheese	#3	2	1	-	-	Gram positive rods	796	99.87	Lacticaseibacillus paracasei
	February/March (Winter)	Cheese	#3	2	2	-	-	Gram positive cocci	876	99.77	Lactococcus lactis
	February/March (Winter)	Cheese	#3	2	3	-	-	Gram positive cocci	577	99.83	Lactococcus lactis
	March/April (Spring)	Ovine raw milk	#1	1	1	-	-	Gram positive rods	819	100	Lacticaseibacillus paracasei
	March/April (Spring)	Ovine raw milk	#1	1	2	-	-	Gram positive rods	785	100	Leuconostoc mesenteroides
	March/April (Spring)	Ovine raw milk	#1	1	3	-	-	Gram positive rods	784	100	Leuconostoc mesenteroides
	March/April (Spring)	Ovine raw milk	#1	2	1	-	-	Gram positive rods	639	97.97	Lacticaseibacillus casei
	March/April (Spring)	Ovine raw milk	#1	2	2	-	-	Gram positive rods	951	100	Lacticaseibacillus paracasei
	March/April (Spring)	Ovine raw milk	#1	2	3	-	-	Gram positive cocci	294	98.64	Enterococcus faecium
	March/April (Spring)	Ovine raw milk	#1	3	1	-	-	Gram positive rods	513	99.61	Lacticaseibacillus casei
	March/April (Spring)	Ovine raw milk	#1	3	2	-	-	Gram positive rods	843	100	Lacticaseibacillus paracasei
	March/April (Spring)	Ovine raw milk	#1	3	3	-	-	Gram positive rods	905	100	Lacticaseibacillus paracasei
	March/April (Spring)	Cardoon	#1	2	1	-	-	Gram positive rods	546	99.08	Lacticaseibacillus paracasei
	March/April (Spring)	Cardoon	#2	2	1	NA	NA	-	-	-	-
	March/April (Spring)	Cardoon	#3	2	1	NA	NA	-	-	-	-
	March/April (Spring)	Curd	#1	1	1	-	-	Gram positive cocci	877	100	Enterococcus faecium
	March/April (Spring)	Curd	#1	1	2	-	-	Gram positive rods	225	99.56	Lacticaseibacillus paracasei
	March/April (Spring)	Curd	#1	1	3	-	-	Gram positive rods	799	99.75	Leuconostoc mesenteroides
	March/April (Spring)	Curd	#1	2	1	-	-	Gram positive rods	780	99.36	Lacticaseibacillus paracasei
	March/April (Spring)	Curd	#1	2	2	-	-	Gram positive cocci	852	100	Enterococcus faecium
	March/April (Spring)	Curd	#1	2	3	-	-	Gram positive rods	946	100	Lacticaseibacillus paracasei
	March/April (Spring)	Curd	#1	3	1	-	-	Gram positive rods	802	100	Leuconostoc mesenteroides
	March/April (Spring)	Curd	#1	3	2	-	-	Gram positive rods	896	100	Leuconostoc mesenteroides
	March/April (Spring)	Curd	#1	3	3	-	-	Gram positive rods	582	100	Lacticaseibacillus paracasei
	March/April (Spring)	Curd	#2	1	1	-	-	Gram positive cocci	881	100	Enterococcus faecium
	March/April (Spring)	Curd	#2	1	2	-	-	Gram positive rods	916	100	Leuconostoc mesenteroides
	March/April (Spring)	Curd	#2	1	3	-	-	Gram positive rods	916	100	Leuconostoc mesenteroides
	March/April (Spring)	Curd	#2	2	1	-	-	Gram positive rods	840	100	Lacticaseibacillus paracasei
	March/April (Spring)	Curd	#2	2	2	-	-	Gram positive rods	830	100	Leuconostoc mesenteroides
	March/April (Spring)	Curd	#2	2	3	-	-	Gram positive rods	1387	100	Lacticaseibacillus paracasei
	March/April (Spring)	Curd	#2	3	1	-	-	Gram positive rods	874	100	Lacticaseibacillus paracasei
	March/April (Spring)	Curd	#2	3	2	-	-	Gram positive cocci	650	99.85	Enterococcus durans
	March/April (Spring)	Curd	#3	1	1	-	-	Gram positive rods	614	100	Lacticaseibacillus casei
	March/April (Spring)	Curd	#3	1	2	-	-	Gram positive rods	813	100	Leuconostoc mesenteroides
	March/April (Spring)	Curd	#3	1	3	-	-	Gram positive rods	1389	99.93	Lacticaseibacillus paracasei
	March/April (Spring)	Curd	#3	2	1	-	-	Gram positive rods	1367	95.18	Lacticaseibacillus paracasei
	March/April (Spring)	Curd	#3	2	2	-	-	Gram positive rods	817	99.88	Leuconostoc mesenteroides
	March/April (Spring)	Curd	#3	2	3	-	-	Gram positive rods	300	98	Lacticaseibacillus casei
	March/April (Spring)	Curd	#3	3	1	-	-	Gram positive rods	777	100	Lacticaseibacillus casei
	March/April (Spring)	Curd	#3	3	3	-	-	Gram positive rods	863	100	Lacticaseibacillus paracasei
	March/April (Spring)	Cheese	#1	1	1	-	-	Gram positive cocci	892	100	Enterococcus faecium
	March/April (Spring)	Cheese	#1	1	2	-	-	Gram positive rods	850	100	Leuconostoc mesenteroides
	March/April (Spring)	Cheese	#1	1	3	-	-	Gram positive rods	936	100	Lacticaseibacillus casei
	March/April (Spring)	Cheese	#1	2	1	-	-	Gram positive rods	673	98.51	Lacticaseibacillus casei
	March/April (Spring)	Cheese	#1	2	2	-	-	Gram positive rods	847	100	Lacticaseibacillus paracasei
	March/April (Spring)	Cheese	#1	2	3	-	-	Gram positive rods	816	99.88	Lacticaseibacillus casei
	March/April (Spring)	Cheese	#1	3	1	-	-	Gram positive rods	331	100	Leuconostoc citreum
	March/April (Spring)	Cheese	#1	3	2	-	-	Gram positive rods	816	100	Leuconostoc mesenteroides
	March/April (Spring)	Cheese	#1	3	3	-	-	Gram positive rods	844	99.76	Leuconostoc mesenteroides
	March/April (Spring)	Cheese	#2	1	1	-	-	Gram positive rods	825	100	Lacticaseibacillus casei
	March/April (Spring)	Cheese	#2	1	2	-	-	Gram positive rods	946	99.88	Lacticaseibacillus casei
	March/April (Spring)	Cheese	#2	1	3	-	-	Gram positive rods	785	100	Leuconostoc mesenteroides
	March/April (Spring)	Cheese	#2	2	1	-	-	Gram positive rods	828	100	Leuconostoc mesenteroides
	March/April (Spring)	Cheese	#2	2	2	-	-	Gram positive rods	848	100	Lacticaseibacillus paracasei
	March/April (Spring)	Cheese	#2	2	3	-	-	Gram positive rods	831	100	Leuconostoc mesenteroides
	March/April (Spring)	Cheese	#2	3	1	-	-	Gram positive cocci	891	99.89	Lactococcus lactis
	March/April (Spring)	Cheese	#2	3	2	-	-	Gram positive cocci	546	99.82	Enterococcus faecium
	March/April (Spring)	Cheese	#2	3	3	-	-	Gram positive rods	689	99.85	Leuconostoc citreum
	March/April (Spring)	Cheese	#3	1	1	-	-	Gram positive rods	1375	96.23	Lacticaseibacillus paracasei
	March/April (Spring)	Cheese	#3	1	2	-	-	Gram positive rods	866	100	Leuconostoc mesenteroides
	March/April (Spring)	Cheese	#3	1	3	-	-	Gram positive rods	1392	96.13	Lacticaseibacillus paracasei
	March/April (Spring)	Cheese	#3	2	1	-	-	Gram positive rods	418	98.09	Lacticaseibacillus casei
	March/April (Spring)	Cheese	#3	2	2	-	-	Gram positive rods	1371	96.35	Lacticaseibacillus paracasei
	March/April (Spring)	Cheese	#3	2	3	-	-	Gram positive rods	1387	96.05	Lacticaseibacillus paracasei
	March/April (Spring)	Cheese	#3	3	1	-	-	Gram positive cocci	663	99.7	Lactococcus lactis
	March/April (Spring)	Cheese	#3	3	2	-	-	Gram positive rods	1297	95.62	Lacticaseibacillus paracasei
	March/April (Spring)	Cheese	#3	3	3	-	-	Gram positive cocci	985	99.90	Lactococcus lactis
